# Supplementary material
Source: Springer Nature journal article supplement (https://www.springermedizin.de/resource/supplementary/12936_2014_3326_MOESM16_ESM.pdf/9545666)
Supplement: MOESM16 [file 9545666]

|     |     |     |      |      |     |     |     |     |
|-----|-----|-----|------|------|-----|-----|-----|-----|
| 3.2 | 1.5 | 5.2 | 16.0 | 39.1 | 6.5 | 1.0 | 3.9 | 2.9 |
|-----|-----|-----|------|------|-----|-----|-----|-----|

97.3

|     |     |     |
|-----|-----|-----|
| 2.4 | 1.3 | 2.3 |
| 0.9 | 1.4 | 1.4 |
| 4.1 | 2.4 | 1.8 |
